# Supplementary material for: Apical Vertebras Distribution Modifier for Coronal Balance Classification in Adult Idiopathic Scoliosis
Source: MDPI journal article supplement (doi:10.3390/jpm13060897), 2023-05-26
Supplement: s1 [file s1]

Supplemental Table S1. Distribution of LIV and UIV.

| UIV | Number of cases | LIV | Number of cases |
|-----|-----------------|-----|-----------------|
| T1  | 1               | T12 | 1               |
| T2  | 24              | L1  | 1               |
| T3  | 27              | L2  | 10              |
| T4  | 15              | L3  | 28              |
| T5  | 6               | L4  | 27              |
| T6  | 3               | L5  | 13              |
| T7  | 2               |     |                 |
| T8  | 1               |     |                 |
| T9  | 1               |     |                 |

Supplemental Table S2. Reliability test of consistency between different observers (n=80).

|            | CB- | CB+ | CIB- | CIB+ | Kappa value |
|------------|-----|-----|------|------|-------------|
| Observer 1 | 10  | 46  | 10   | 14   | 0.959       |
| Observer 2 | 11  | 45  | 9    | 15   |             |

Supplemental Table S3. Repeatability analysis for the same observer (n=80).

|                       | CB- | CB+ | CIB- | CIB+ | Kappa value |
|-----------------------|-----|-----|------|------|-------------|
| First classification  | 10  | 46  | 10   | 14   | 0.979       |
| Second classification | 10  | 46  | 11   | 13   |             |
